# Supplementary material for: Tenebrio molitor Larvae Meal Affects the Cecal Microbiota of Growing Pigs
Source: PubMed Central journal article supplement (PMC7401588; doi:10.3390/ani10071151), 2020-07-07
Supplement: animals-10-01151-s001.pdf [file animals-10-01151-s001.pdf]

# *Tenebrio Molitor* Larvae Meal Affects the Cecal Microbiota of Growing Pigs

Sandra Meyer, Denise K. Gessner, Garima Maheshwari, Julia Röhrig, Theresa Friedhoff, Erika Most, Holger Zorn, Robert Ringseis and Klaus Eder

Table S1. Characteristics of gene-specific primers used for qPCR analysis in small intestinal mucosa.

| Gene                   | Forward (5' to 3')<br>Reverse (5' to 3')           | Annealing<br>Temperature<br>(°C) | PCR<br>Product<br>Size (bp) | NCBI GeneBank<br>Accession No. | Slope | R <sup>2</sup> | E    |
|------------------------|----------------------------------------------------|----------------------------------|-----------------------------|--------------------------------|-------|----------------|------|
| <i>Reference genes</i> |                                                    |                                  |                             |                                |       |                |      |
| <i>ATP5MC1</i>         | CAGTCACCTTGAGCCGGGCGA<br>TAGCGCCCCGGTGGTTTGC       | 64                               | 94                          | NM_001025218                   | -3.55 | 0.999          | 1.91 |
| <i>GAPDH</i>           | AGGGGCTCTCCAGAACATCATCC<br>TCGCGTGCTCTTGCTGGGGTTGG | 60                               | 446                         | NM_001206359                   | -3.33 | 1.000          | 2.00 |
| <i>RPS9</i>            | GTCGCAAGACTTATGTGACC<br>AGCTTAAAGACCTGGGTCTG       | 62                               | 325                         | XM_021094878                   | -3.28 | 0.999          | 2.02 |
| <i>SDHA</i>            | CTACGCCCCGTCGCAAAGG<br>AGTTTGCCCCCAGGCGGTTG        | 64                               | 380                         | XM_021076930                   | -3.32 | 1.000          | 2.00 |
| <i>Target genes</i>    |                                                    |                                  |                             |                                |       |                |      |
| <i>CLDN1</i>           | GATCGGCTCCATCGTCAGCA<br>CGACACGCAGGACATCCACA       | 60                               | 115                         | NM_001244539                   | -3.54 | 0.994          | 1.92 |
| <i>CXCL8</i>           | ACTTCCAAACTGGCTGTTGC<br>GGAATGCGTATTTATGCACTGG     | 59                               | 120                         | NM_213867                      | -3.59 | 0.994          | 1.90 |
| <i>IL1B</i>            | GTTCTCTGAGAAATGGGAGC<br>CTGGTCATCATCACAGAAGG       | 58                               | 143                         | NM_214055                      | -3.51 | 0.997          | 1.93 |
| <i>IL6</i>             | AAGGTGATGCCACCTCAGAC<br>TCTGCCAGTACCTCCTTGCT       | 60                               | 151                         | NM_001252429                   | -3.54 | 0.994          | 1.92 |
| <i>MUC1</i>            | CGGGCTTCTGGGACTCTTTT                               | 58                               | 312                         | XM_021089728                   | -3.63 | 0.999          | 1.89 |

|                |                                                   |    |     |              |       |       |      |
|----------------|---------------------------------------------------|----|-----|--------------|-------|-------|------|
|                | TTCTTTCGTCGGCACTGACA                              |    |     |              |       |       |      |
| <i>MUC13</i>   | TGTGTTTTGCTTTGGGTCCAG<br>CACAGCCAACCTCCACTGTAGC   | 58 | 171 | NM_001105293 | -3.58 | 1.000 | 1.90 |
| <i>MUC2</i>    | CTTCCAACCATCCTCCCACC<br>GCCGCTTGAAATCATCGCC       | 58 | 174 | XM_021082584 | -3.53 | 0.996 | 1.92 |
| <i>OCN</i>     | GCCTACTCGTCCAACGGGAA<br>GCCCGTCGTGTAGTCTGTCT      | 60 | 246 | NM_001163647 | -3.60 | 0.999 | 1.90 |
| <i>SLC15A1</i> | CAGACTTCGACCACAACGGA<br>TTATCCCGCCAGTACCCAGA      | 58 | 99  | NM_214347    | -3.52 | 0.998 | 1.93 |
| <i>SLC2A2</i>  | CGCAACCATTTGGAGTTGGCGC<br>TGGCACAAACAAACATCCCCTCA | 63 | 122 | NM_001097417 | -3.37 | 0.997 | 1.98 |
| <i>SLC2A5</i>  | CTGACACTGGTGCTTTGCTTT<br>TTCGCTCATGTATCCCCGA      | 57 | 156 | XM_021095282 | -3.45 | 0.989 | 1.95 |
| <i>SLC5A1</i>  | GTGGCGGACAGTAGTGAACA<br>AGAAGGCAGGATTTTCAGGCA     | 57 | 89  | NM_001164021 | -3.31 | 1.000 | 1.92 |
| <i>TJP1</i>    | GTCGTCCTGATCCTGACCCG<br>TGGTGGGTTTGGTGGGTTGA      | 60 | 207 | XM_021098827 | -3.26 | 0.996 | 2.03 |
| <i>TNF</i>     | CCAAGGACTCAGATCATCGT<br>GCTGGTTGTCTTTCAGCTTC      | 58 | 146 | NM_214022    | -3.36 | 1.000 | 1.99 |

**Table S2.** Operational taxonomic units (OUT) identified in cecum digesta of all experimental groups.

| OTU   | Phylum         | Class               | Order           | Family           | Genus                     |
|-------|----------------|---------------------|-----------------|------------------|---------------------------|
| OTU_1 | Bacteroidetes  | Bacteroidia         | Bacteroidales   | Prevotellaceae   | Prevotella                |
| OTU_2 | Firmicutes     | Clostridia          | Clostridiales   | Clostridiaceae 1 | Clostridium sensu stricto |
| OTU_3 | Firmicutes     | Bacilli             | Lactobacillales | Lactobacillaceae | Lactobacillus             |
| OTU_4 | Proteobacteria | Gammaproteobacteria | Orbales         | Orbaceae         | Frischella                |
| OTU_5 | Firmicutes     | Negativicutes       | Selenomonadales | Veillonellaceae  | Anaerovibrio              |
| OTU_6 | Firmicutes     | Negativicutes       | Selenomonadales | Veillonellaceae  | Anaerovibrio              |

|        |                |                     |                 |                       |                                   |
|--------|----------------|---------------------|-----------------|-----------------------|-----------------------------------|
| OTU_7  | Bacteroidetes  | Bacteroidia         | Bacteroidales   | Prevotellaceae        | Prevotella                        |
| OTU_8  | Firmicutes     | Clostridia          | Clostridiales   | Lachnospiraceae       | Roseburia                         |
| OTU_9  | Bacteroidetes  | Bacteroidia         | Bacteroidales   | Prevotellaceae        | Prevotella                        |
| OTU_10 | Bacteroidetes  | Bacteroidia         | Bacteroidales   | Prevotellaceae        | Alloprevotella                    |
| OTU_11 | Firmicutes     | Negativicutes       | Selenomonadales | Acidaminococcaceae    | Phascolarctobacterium             |
| OTU_12 | Proteobacteria | Gammaproteobacteria | Aeromonadales   | Succinivibrionaceae   | Succinivibrio                     |
| OTU_13 | Firmicutes     | Clostridia          | Clostridiales   | Ruminococcaceae       | Faecalibacterium                  |
| OTU_14 | Firmicutes     | Negativicutes       | Selenomonadales | Veillonellaceae       | Anaerovibrio                      |
| OTU_15 | Firmicutes     | Negativicutes       | Selenomonadales | Veillonellaceae       | Dialister                         |
| OTU_16 | Spirochaetes   | Spirochaetia        | Spirochaetales  | Spirochaetaceae       | Treponema                         |
| OTU_17 | Bacteroidetes  | Bacteroidia         | Bacteroidales   | Prevotellaceae        | Prevotella                        |
| OTU_18 | Firmicutes     | Clostridia          | Clostridiales   | Ruminococcaceae       | Gemmiger                          |
| OTU_19 | Firmicutes     | Clostridia          | Clostridiales   | Peptostreptococcaceae | Terrisporobacter                  |
| OTU_20 | Bacteroidetes  | Bacteroidia         | Bacteroidales   | Prevotellaceae        | Prevotella                        |
| OTU_21 | Firmicutes     | Clostridia          | Clostridiales   | Lachnospiraceae       | Roseburia                         |
| OTU_22 | Firmicutes     | Negativicutes       | Selenomonadales | Veillonellaceae       | Megasphaera                       |
| OTU_23 | Bacteroidetes  | Bacteroidia         | Bacteroidales   | Prevotellaceae        | Alloprevotella                    |
| OTU_24 | Bacteroidetes  | Bacteroidia         | Bacteroidales   | Prevotellaceae        | Prevotella                        |
| OTU_25 | Bacteroidetes  | Bacteroidia         | Bacteroidales   | Bacteroidaceae        | Anaerorhabdus                     |
| OTU_26 | Firmicutes     | Negativicutes       | Selenomonadales | Veillonellaceae       | Mitsuokella                       |
| OTU_27 | Firmicutes     | Clostridia          | Clostridiales   | Ruminococcaceae       | Oscillibacter                     |
| OTU_28 | Firmicutes     | Clostridia          | Clostridiales   | Lachnospiraceae       | Lachnospiraceae_incertainae_sedis |
| OTU_29 | Firmicutes     | Clostridia          | Clostridiales   | Lachnospiraceae       | Lachnospiraceae_incertainae_sedis |
| OTU_30 | Firmicutes     | Clostridia          | Clostridiales   | Ruminococcaceae       | Gemmiger                          |
| OTU_31 | Bacteroidetes  | Bacteroidia         | Bacteroidales   | Prevotellaceae        | Alloprevotella                    |
| OTU_32 | Bacteroidetes  | Bacteroidia         | Bacteroidales   | Prevotellaceae        | Paraprevotella                    |
| OTU_33 | Bacteroidetes  | Bacteroidia         | Bacteroidales   | Prevotellaceae        | Paraprevotella                    |
| OTU_34 | Firmicutes     | Clostridia          | Clostridiales   | Lachnospiraceae       | Clostridium XIVa                  |
| OTU_35 | Bacteroidetes  | Bacteroidia         | Bacteroidales   | Prevotellaceae        | Prevotella                        |
| OTU_37 | Firmicutes     | Clostridia          | Clostridiales   | Ruminococcaceae       | Gemmiger                          |
| OTU_38 | Bacteroidetes  | Bacteroidia         | Bacteroidales   | Prevotellaceae        | Prevotella                        |
| OTU_39 | Bacteroidetes  | Bacteroidia         | Bacteroidales   | Prevotellaceae        | Alloprevotella                    |
| OTU_40 | Bacteroidetes  | Bacteroidia         | Bacteroidales   | Porphyromonadaceae    | Falsiporphyromonas                |

|        |                |                     |                   |                       |                                 |
|--------|----------------|---------------------|-------------------|-----------------------|---------------------------------|
| OTU_41 | Bacteroidetes  | Bacteroidia         | Bacteroidales     | Prevotellaceae        | Prevotella                      |
| OTU_42 | Spirochaetes   | Spirochaetia        | Spirochaetales    | Spirochaetaceae       | Treponema                       |
| OTU_43 | Bacteroidetes  | Bacteroidia         | Bacteroidales     | Prevotellaceae        | Prevotella                      |
| OTU_44 | Bacteroidetes  | Bacteroidia         | Bacteroidales     | Prevotellaceae        | Prevotella                      |
| OTU_45 | Firmicutes     | Clostridia          | Clostridiales     | Ruminococcaceae       | Faecalibacterium                |
| OTU_46 | Firmicutes     | Clostridia          | Clostridiales     | Lachnospiraceae       | Blautia                         |
| OTU_47 | Bacteroidetes  | Bacteroidia         | Bacteroidales     | Prevotellaceae        | Prevotella                      |
| OTU_48 | Bacteroidetes  | Bacteroidia         | Bacteroidales     | Prevotellaceae        | Prevotella                      |
| OTU_49 | Bacteroidetes  | Bacteroidia         | Bacteroidales     | Prevotellaceae        | Prevotella                      |
| OTU_50 | Bacteroidetes  | Bacteroidia         | Bacteroidales     | Porphyromonadaceae    | Macellibacteroides              |
| OTU_51 | Bacteroidetes  | Bacteroidia         | Bacteroidales     | Prevotellaceae        | Prevotella                      |
| OTU_52 | Firmicutes     | Clostridia          | Clostridiales     | Lachnospiraceae       | Coprococcus                     |
| OTU_54 | Proteobacteria | Gammaproteobacteria | Aeromonadales     | Succinivibrionaceae   | Succinivibrio                   |
| OTU_55 | Firmicutes     | Clostridia          | Clostridiales     | Ruminococcaceae       | Sporobacter                     |
| OTU_56 | Firmicutes     | Clostridia          | Clostridiales     | Peptostreptococcaceae | Clostridium XI                  |
| OTU_57 | Bacteroidetes  | Bacteroidia         | Bacteroidales     | Prevotellaceae        | Prevotella                      |
| OTU_58 | Proteobacteria | Deltaproteobacteria | Bdellovibrionales | Bdellovibrionaceae    | Vampirovibrio                   |
| OTU_59 | Spirochaetes   | Spirochaetia        | Spirochaetales    | Spirochaetaceae       | Treponema                       |
| OTU_60 | Bacteroidetes  | Bacteroidia         | Bacteroidales     | Marinilabiliaceae     | Alkalitalea                     |
| OTU_61 | Proteobacteria | Gammaproteobacteria | Enterobacteriales | Enterobacteriaceae    | Escherichia/Shigella            |
| OTU_62 | Firmicutes     | Clostridia          | Clostridiales     | Ruminococcaceae       | Clostridium IV                  |
| OTU_63 | Bacteroidetes  | Bacteroidia         | Bacteroidales     | Prevotellaceae        | Paraprevotella                  |
| OTU_65 | Firmicutes     | Bacilli             | Lactobacillales   | Lactobacillaceae      | Lactobacillus                   |
| OTU_66 | Bacteroidetes  | Bacteroidia         | Bacteroidales     | Prevotellaceae        | Prevotella                      |
| OTU_67 | Firmicutes     | Clostridia          | Clostridiales     | Lachnospiraceae       | Lachnospiraceae_incertain_sedis |
| OTU_68 | Bacteroidetes  | Bacteroidia         | Bacteroidales     | Prevotellaceae        | Alloprevotella                  |
| OTU_69 | Firmicutes     | Clostridia          | Clostridiales     | Lachnospiraceae       | Blautia                         |
| OTU_70 | Firmicutes     | Negativicutes       | Selenomonadales   | Veillonellaceae       | Anaerovibrio                    |
| OTU_71 | Bacteroidetes  | Bacteroidia         | Bacteroidales     | Prevotellaceae        | Prevotella                      |
| OTU_72 | Firmicutes     | Clostridia          | Clostridiales     | Ruminococcaceae       | Flavonifractor                  |
| OTU_73 | Firmicutes     | Clostridia          | Clostridiales     | Eubacteriaceae        | Eubacterium                     |
| OTU_74 | Bacteroidetes  | Bacteroidia         | Bacteroidales     | Prevotellaceae        | Alloprevotella                  |
| OTU_75 | Firmicutes     | Clostridia          | Clostridiales     | Lachnospiraceae       | Lachnospiraceae_incertain_sedis |

|         |                |                     |                   |                                     |                                |
|---------|----------------|---------------------|-------------------|-------------------------------------|--------------------------------|
| OTU_76  | Firmicutes     | Clostridia          | Clostridiales     | Lachnospiraceae                     | Lachnospiraceae_incertae_sedis |
| OTU_77  | Bacteroidetes  | Bacteroidia         | Bacteroidales     | Prevotellaceae                      | Prevotella                     |
| OTU_79  | Firmicutes     | Clostridia          | Clostridiales     | Ruminococcaceae                     | Clostridium IV                 |
| OTU_80  | Bacteroidetes  | Bacteroidia         | Bacteroidales     | Porphyromonadaceae                  | Falsiporphyromonas             |
| OTU_81  | Bacteroidetes  | Bacteroidia         | Bacteroidales     | Bacteroidaceae                      | Bacteroides                    |
| OTU_82  | Firmicutes     | Clostridia          | Clostridiales     | Lachnospiraceae                     | Butyrivibrio                   |
| OTU_83  | Firmicutes     | Clostridia          | Clostridiales     | Clostridiaceae 1                    | Clostridium sensu stricto      |
| OTU_84  | Firmicutes     | Clostridia          | Clostridiales     | Ruminococcaceae                     | Anaerobacterium                |
| OTU_85  | Firmicutes     | Clostridia          | Clostridiales     | Lachnospiraceae                     | Roseburia                      |
| OTU_86  | Firmicutes     | Bacilli             | Lactobacillales   | Lactobacillaceae                    | Lactobacillus                  |
| OTU_88  | Firmicutes     | Clostridia          | Clostridiales     | Lachnospiraceae                     | Clostridium XIVa               |
| OTU_91  | Firmicutes     | Clostridia          | Clostridiales     | Ruminococcaceae                     | Flavonifractor                 |
| OTU_92  | Firmicutes     | Clostridia          | Clostridiales     | Clostridiaceae 1                    | Clostridium sensu stricto      |
| OTU_93  | Firmicutes     | Clostridia          | Clostridiales     | Christensenellaceae                 | Christensenella                |
| OTU_94  | Bacteroidetes  | Bacteroidia         | Bacteroidales     | Prevotellaceae                      | Paraprevotella                 |
| OTU_95  | Bacteroidetes  | Bacteroidia         | Bacteroidales     | Porphyromonadaceae                  | Barnesiella                    |
| OTU_97  | Bacteroidetes  | Bacteroidia         | Bacteroidales     | Prevotellaceae                      | Prevotella                     |
| OTU_99  | Bacteroidetes  | Bacteroidia         | Bacteroidales     | Prevotellaceae                      | Prevotella                     |
| OTU_100 | Firmicutes     | Clostridia          | Clostridiales     | Lachnospiraceae                     | Lactonifactor                  |
| OTU_101 | Firmicutes     | Bacilli             | Lactobacillales   | Streptococcaceae                    | Streptococcus                  |
| OTU_105 | Bacteroidetes  | Bacteroidia         | Bacteroidales     | Prevotellaceae                      | Prevotella                     |
| OTU_108 | Bacteroidetes  | Bacteroidia         | Bacteroidales     | Porphyromonadaceae                  | Barnesiella                    |
| OTU_110 | Firmicutes     | Clostridia          | Clostridiales     | Ruminococcaceae                     | Sporobacter                    |
| OTU_112 | Bacteroidetes  | Bacteroidia         | Bacteroidales     | Prevotellaceae                      | Prevotella                     |
| OTU_113 | Proteobacteria | Deltaproteobacteria | Bdellovibrionales | Bdellovibrionaceae                  | Vampirovibrio                  |
| OTU_115 | Bacteroidetes  | Bacteroidia         | Bacteroidales     | Prevotellaceae                      | Prevotella                     |
| OTU_116 | Firmicutes     | Clostridia          | Clostridiales     | Clostridiales_Incertae<br>Sedis XII | Guggenheimella                 |
| OTU_118 | Bacteroidetes  | Bacteroidia         | Bacteroidales     | Porphyromonadaceae                  | Barnesiella                    |
| OTU_119 | Firmicutes     | Clostridia          | Clostridiales     | Lachnospiraceae                     | Clostridium XIVa               |
| OTU_122 | Firmicutes     | Clostridia          | Clostridiales     | Lachnospiraceae                     | Lachnospiraceae_incertae_sedis |
| OTU_126 | Bacteroidetes  | Bacteroidia         | Bacteroidales     | Prevotellaceae                      | Prevotella                     |
| OTU_127 | Firmicutes     | Negativicutes       | Selenomonadales   | Veillonellaceae                     | Selenomonas                    |

|         |                |                    |                   |                                    |                                |
|---------|----------------|--------------------|-------------------|------------------------------------|--------------------------------|
| OTU_130 | Firmicutes     | Clostridia         | Clostridiales     | Lachnospiraceae                    | Clostridium XIVa               |
| OTU_131 | Proteobacteria | Betaproteobacteria | Rhodocyclales     | Rhodocyclaceae                     | Azovibrio                      |
| OTU_132 | Firmicutes     | Clostridia         | Clostridiales     | Lachnospiraceae                    | Lachnospiraceae_incertae_sedis |
| OTU_134 | Firmicutes     | Clostridia         | Clostridiales     | Ruminococcaceae                    | Ruminococcus                   |
| OTU_142 | Bacteroidetes  | Bacteroidia        | Bacteroidales     | Prevotellaceae                     | Prevotella                     |
| OTU_145 | Bacteroidetes  | Bacteroidia        | Bacteroidales     | Prevotellaceae                     | Prevotella                     |
| OTU_147 | Firmicutes     | Clostridia         | Clostridiales     | Lachnospiraceae                    | Clostridium XIVa               |
| OTU_151 | Bacteroidetes  | Bacteroidia        | Bacteroidales     | Bacteroidaceae                     | Bacteroides                    |
| OTU_153 | Firmicutes     | Clostridia         | Clostridiales     | Ruminococcaceae                    | Papillibacter                  |
| OTU_154 | Firmicutes     | Clostridia         | Clostridiales     | Ruminococcaceae                    | Clostridium IV                 |
| OTU_157 | Firmicutes     | Negativicutes      | Selenomonadales   | Veillonellaceae                    | Selenomonas                    |
| OTU_158 | Firmicutes     | Clostridia         | Clostridiales     | Ruminococcaceae                    | Ruminococcus                   |
| OTU_159 | Firmicutes     | Clostridia         | Clostridiales     | Ruminococcaceae                    | Oscillibacter                  |
| OTU_161 | Actinobacteria | Actinobacteridae   | Bifidobacteriales | Bifidobacteriaceae                 | Bifidobacteriaceae             |
| OTU_163 | Bacteroidetes  | Bacteroidia        | Bacteroidales     | Prevotellaceae                     | Prevotella                     |
| OTU_166 | Firmicutes     | Clostridia         | Clostridiales     | Ruminococcaceae                    | Oscillibacter                  |
| OTU_172 | Firmicutes     | Clostridia         | Clostridiales     | Lachnospiraceae                    | Clostridium XIVa               |
| OTU_175 | Firmicutes     | Clostridia         | Clostridiales     | Lachnospiraceae                    | Clostridium XIVa               |
| OTU_184 | Firmicutes     | Negativicutes      | Selenomonadales   | Veillonellaceae                    | Mitsuokella                    |
| OTU_188 | Bacteroidetes  | Bacteroidia        | Bacteroidales     | Porphyromonadaceae                 | Macellibacteroides             |
| OTU_193 | Firmicutes     | Clostridia         | Clostridiales     | Lachnospiraceae                    | Roseburia                      |
| OTU_198 | Firmicutes     | Clostridia         | Clostridiales     | Lachnospiraceae                    | Fusicatenibacter               |
| OTU_218 | Bacteroidetes  | Bacteroidia        | Bacteroidales     | Prevotellaceae                     | Paraprevotella                 |
| OTU_226 | Firmicutes     | Clostridia         | Clostridiales     | Lachnospiraceae                    | Butyrivibrio                   |
| OTU_235 | Firmicutes     | Clostridia         | Clostridiales     | Ruminococcaceae                    | Intestinimonas                 |
| OTU_240 | Bacteroidetes  | Bacteroidia        | Bacteroidales     | Prevotellaceae                     | Prevotella                     |
| OTU_247 | Bacteroidetes  | Bacteroidia        | Bacteroidales     | Bacteroidaceae                     | Bacteroides                    |
| OTU_272 | Firmicutes     | Clostridia         | Clostridiales     | Ruminococcaceae                    | Oscillibacter                  |
| OTU_276 | Firmicutes     | Clostridia         | Clostridiales     | Ruminococcaceae                    | Clostridium IV                 |
| OTU_282 | Bacteroidetes  | Bacteroidia        | Bacteroidales     | Porphyromonadaceae                 | Acetobacteroides               |
| OTU_321 | Firmicutes     | Clostridia         | Clostridiales     | Clostridiales_Incertae<br>Sedis XI | Dethiosulfatibacter            |
| OTU_330 | Firmicutes     | Clostridia         | Clostridiales     | Lachnospiraceae                    | Coprococcus                    |

|         |                |                     |                   |                     |                           |
|---------|----------------|---------------------|-------------------|---------------------|---------------------------|
| OTU_333 | Bacteroidetes  | Bacteroidia         | Bacteroidales     | Porphyromonadaceae  | Barnesiella               |
| OTU_346 | Bacteroidetes  | Bacteroidia         | Bacteroidales     | Bacteroidaceae      | Bacteroides               |
| OTU_347 | Bacteroidetes  | Bacteroidia         | Bacteroidales     | Prevotellaceae      | Alloprevotella            |
| OTU_352 | Firmicutes     | Clostridia          | Clostridiales     | Lachnospiraceae     | Clostridium XIVa          |
| OTU_353 | Firmicutes     | Bacilli             | Bacillales        | Bacillaceae 1       | Bacillus                  |
| OTU_363 | Bacteroidetes  | Bacteroidia         | Bacteroidales     | Prevotellaceae      | Alloprevotella            |
| OTU_365 | Bacteroidetes  | Bacteroidia         | Bacteroidales     | Porphyromonadaceae  | Parabacteroides           |
| OTU_367 | Bacteroidetes  | Bacteroidia         | Bacteroidales     | Prevotellaceae      | Prevotella                |
| OTU_383 | Firmicutes     | Clostridia          | Clostridiales     | Ruminococcaceae     | Flavonifractor            |
| OTU_391 | Bacteroidetes  | Bacteroidia         | Bacteroidales     | Bacteroidaceae      | Bacteroides               |
| OTU_394 | Bacteroidetes  | Bacteroidia         | Bacteroidales     | Rikenellaceae       | Alistipes                 |
| OTU_396 | Firmicutes     | Bacilli             | Bacillales        | Staphylococcaceae   | Staphylococcus            |
| OTU_417 | Bacteroidetes  | Bacteroidia         | Bacteroidales     | Bacteroidaceae      | Bacteroides               |
| OTU_418 | Bacteroidetes  | Bacteroidia         | Bacteroidales     | Marinilabiliaceae   | Anaerophaga               |
| OTU_441 | Firmicutes     | Clostridia          | Clostridiales     | Lachnospiraceae     | Clostridium XIVa          |
| OTU_446 | Bacteroidetes  | Bacteroidia         | Bacteroidales     | Rikenellaceae       | Alistipes                 |
| OTU_457 | Bacteroidetes  | Bacteroidia         | Bacteroidales     | Rikenellaceae       | Alistipes                 |
| OTU_463 | Proteobacteria | Betaproteobacteria  | Burkholderiales   | Sutterellaceae      | Sutterella                |
| OTU_465 | Firmicutes     | Clostridia          | Clostridiales     | Lachnospiraceae     | Clostridium XIVa          |
| OTU_467 | Proteobacteria | Gammaproteobacteria | Pseudomonadales   | Pseudomonadaceae    | Pseudomonas               |
| OTU_478 | Firmicutes     | Clostridia          | Clostridiales     | Clostridiaceae 1    | Clostridium sensu stricto |
| OTU_482 | Firmicutes     | Clostridia          | Clostridiales     | Lachnospiraceae     | Acetatifactor             |
| OTU_501 | Bacteroidetes  | Bacteroidia         | Bacteroidales     | Bacteroidaceae      | Bacteroides               |
| OTU_523 | Firmicutes     | Clostridia          | Clostridiales     | Christensenellaceae | Christensenella           |
| OTU_544 | Bacteroidetes  | Bacteroidia         | Bacteroidales     | Porphyromonadaceae  | Parabacteroides           |
| OTU_561 | Firmicutes     | Clostridia          | Clostridiales     | Lachnospiraceae     | Clostridium XIVa          |
| OTU_562 | Firmicutes     | Clostridia          | Clostridiales     | Ruminococcaceae     | Flavonifractor            |
| OTU_573 | Bacteroidetes  | Bacteroidia         | Bacteroidales     | Prevotellaceae      | Alloprevotella            |
| OTU_599 | Actinobacteria | Actinobacteria      | Actinobacteridae  | Actinomycetales     | Micrococcineae            |
| OTU_607 | Proteobacteria | Deltaproteobacteria | Bdellovibrionales | Bdellovibrionaceae  | Vampirovibrio             |
| OTU_663 | Firmicutes     | Clostridia          | Clostridiales     | Ruminococcaceae     | Sporobacter               |
| OTU_669 | Firmicutes     | Clostridia          | Clostridiales     | Lachnospiraceae     | Coprococcus               |
| OTU_670 | Firmicutes     | Bacilli             | Lactobacillales   | Enterococcaceae     | Enterococcus              |

|          |                |                     |                    |                     |                   |
|----------|----------------|---------------------|--------------------|---------------------|-------------------|
| OTU_673  | Actinobacteria | Actinobacteria      | Coriobacteriales   | Coriobacteriaceae   | Enterorhabdus     |
| OTU_683  | Bacteroidetes  | Bacteroidia         | Bacteroidales      | Prevotellaceae      | Prevotella        |
| OTU_703  | Proteobacteria | Deltaproteobacteria | Bdellovibrionales  | Bdellovibrionaceae  | Vampirovibrio     |
| OTU_717  | Firmicutes     | Negativicutes       | Selenomonadales    | Veillonellaceae     | Mitsuokella       |
| OTU_728  | Firmicutes     | Clostridia          | Clostridiales      | Ruminococcaceae     | Faecalibacterium  |
| OTU_731  | Bacteroidetes  | Bacteroidia         | Bacteroidales      | Rikenellaceae       | Alistipes         |
| OTU_738  | Firmicutes     | Clostridia          | Clostridiales      | Lachnospiraceae     | Ruminococcus2     |
| OTU_740  | Firmicutes     | Clostridia          | Clostridiales      | Lachnospiraceae     | Hungatella        |
| OTU_746  | Bacteroidetes  | Bacteroidia         | Bacteroidales      | Rikenellaceae       | Alistipes         |
| OTU_751  | Firmicutes     | Clostridia          | Clostridiales      | Ruminococcaceae     | Clostridium IV    |
| OTU_761  | Firmicutes     | Clostridia          | Clostridiales      | Lachnospiraceae     | Ruminococcus2     |
| OTU_805  | Firmicutes     | Clostridia          | Clostridiales      | Lachnospiraceae     | Ruminococcus2     |
| OTU_806  | Bacteroidetes  | Bacteroidia         | Bacteroidales      | Rikenellaceae       | Alistipes         |
| OTU_886  | Proteobacteria | Gammaproteobacteria | Aeromonadales      | Succinivibrionaceae | Succinivibrio     |
| OTU_900  | Firmicutes     | Clostridia          | Clostridiales      | Ruminococcaceae     | Sporobacter       |
| OTU_933  | Firmicutes     | Erysipelotrichia    | Erysipelotrichales | Erysipelotrichaceae | Clostridium XVIII |
| OTU_934  | Proteobacteria | Betaproteobacteria  | Burkholderiales    | Comamonadaceae      | Delftia           |
| OTU_991  | Bacteroidetes  | Bacteroidia         | Bacteroidales      | Prevotellaceae      | Prevotella        |
| OTU_1002 | Firmicutes     | Clostridia          | Clostridiales      | Ruminococcaceae     | Anaerotruncus     |
| OTU_1057 | Firmicutes     | Clostridia          | Clostridiales      | Lachnospiraceae     | Fusicatenibacter  |
| OTU_1077 | Firmicutes     | Clostridia          | Clostridiales      | Lachnospiraceae     | Clostridium XIVa  |
| OTU_1100 | Proteobacteria | Gammaproteobacteria | Xanthomonadales    | Xanthomonadaceae    | Stenotrophomonas  |
| OTU_1118 | Bacteroidetes  | Bacteroidia         | Bacteroidales      | Prevotellaceae      | Prevotella        |
| OTU_1140 | Bacteroidetes  | Bacteroidia         | Bacteroidales      | Prevotellaceae      | Prevotella        |
| OTU_1160 | Bacteroidetes  | Bacteroidia         | Bacteroidales      | Prevotellaceae      | Prevotella        |
| OTU_1168 | Bacteroidetes  | Bacteroidia         | Bacteroidales      | Bacteroidaceae      | Bacteroides       |
| OTU_1182 | Bacteroidetes  | Bacteroidia         | Bacteroidales      | Prevotellaceae      | Prevotella        |
| OTU_1217 | Bacteroidetes  | Bacteroidia         | Bacteroidales      | Bacteroidaceae      | Bacteroides       |
| OTU_1246 | Firmicutes     | Clostridia          | Clostridiales      | Lachnospiraceae     | Clostridium XIVa  |
| OTU_1251 | Bacteroidetes  | Bacteroidia         | Bacteroidales      | Porphyromonadaceae  | Butyricimonas     |
| OTU_1252 | Bacteroidetes  | Bacteroidia         | Bacteroidales      | Porphyromonadaceae  | Coprobacter       |
| OTU_1253 | Firmicutes     | Clostridia          | Clostridiales      | Ruminococcaceae     | Clostridium IV    |
